# Supplementary material
Source: publisher figshare collection journal article supplement (https://tandf.figshare.com/ndownloader/files/14739938)
Supplement: Supplementary file 1 [file 14739938]

Supplementary material


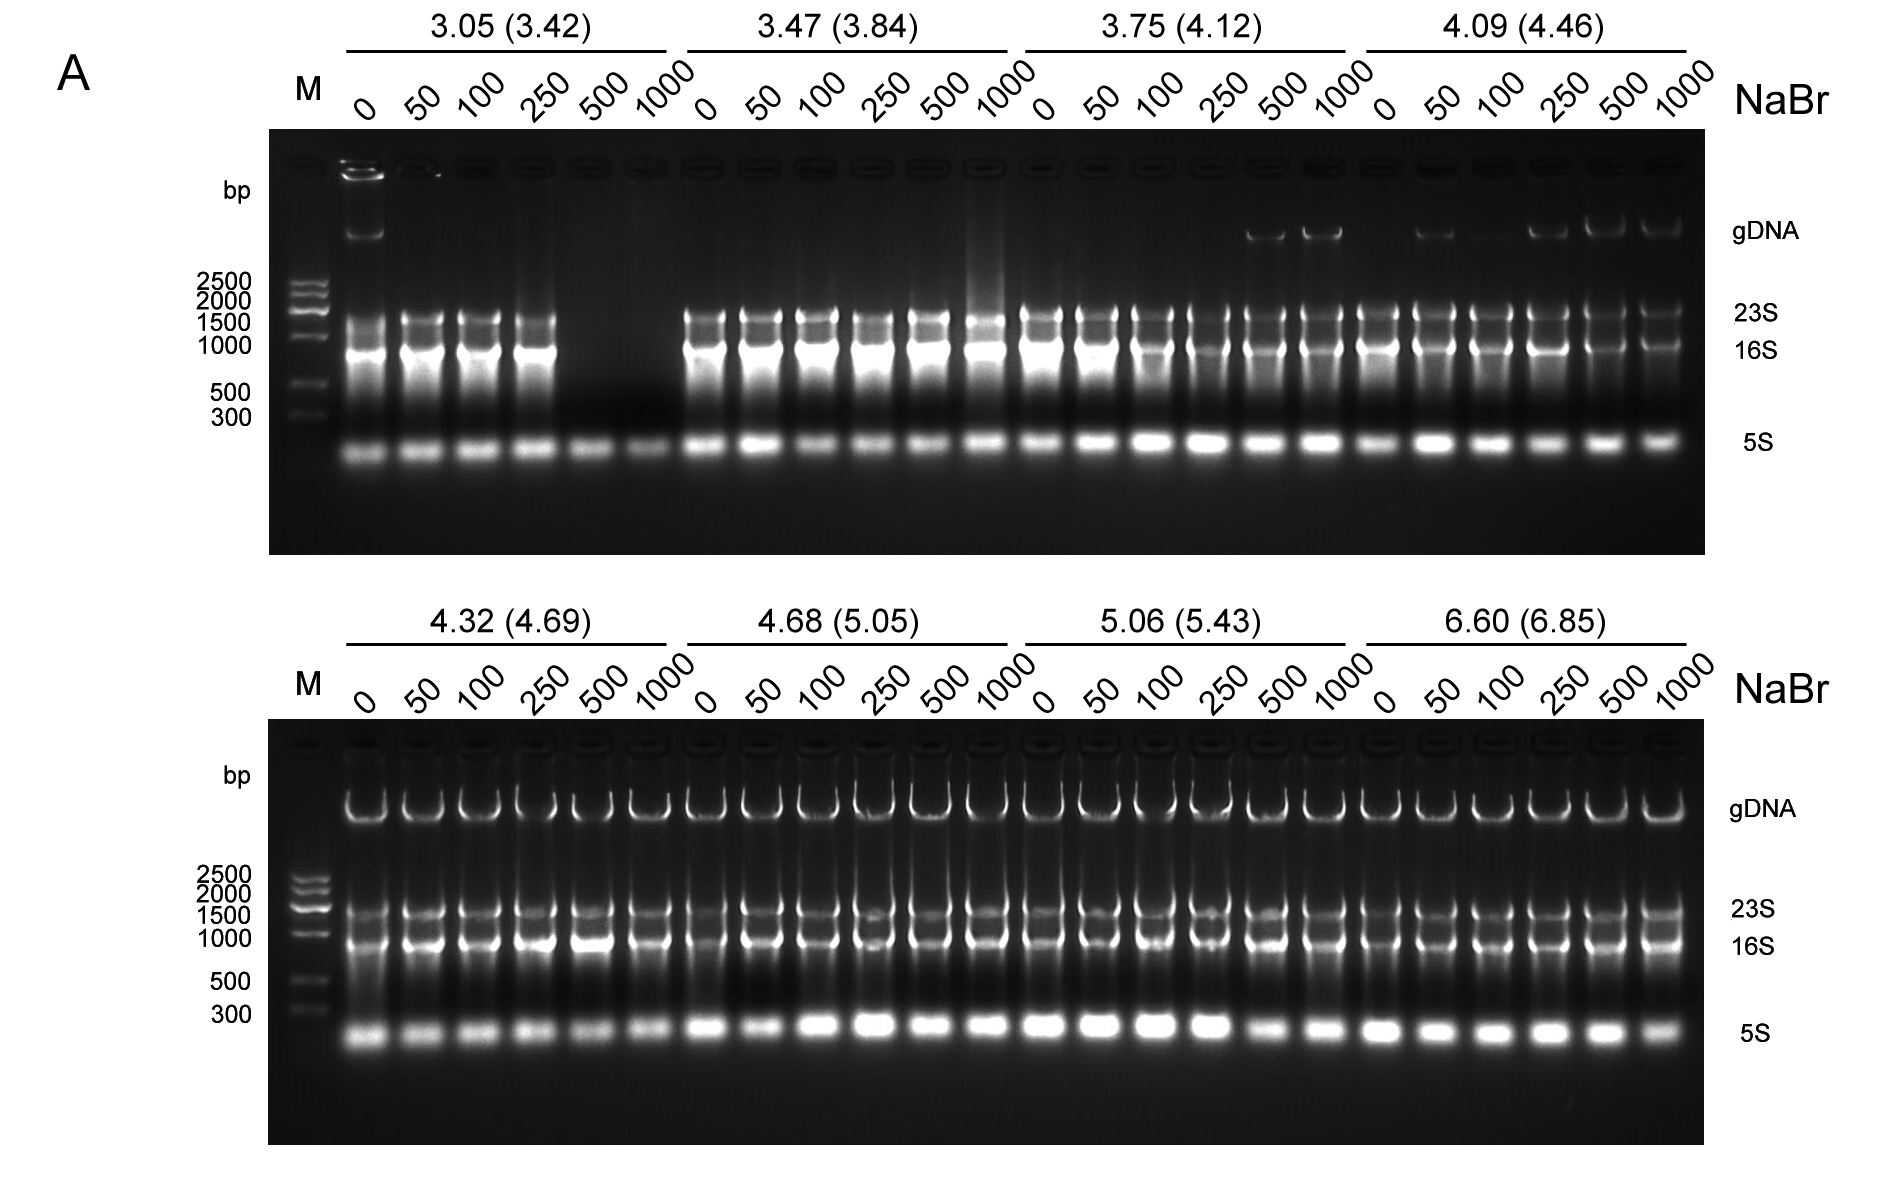


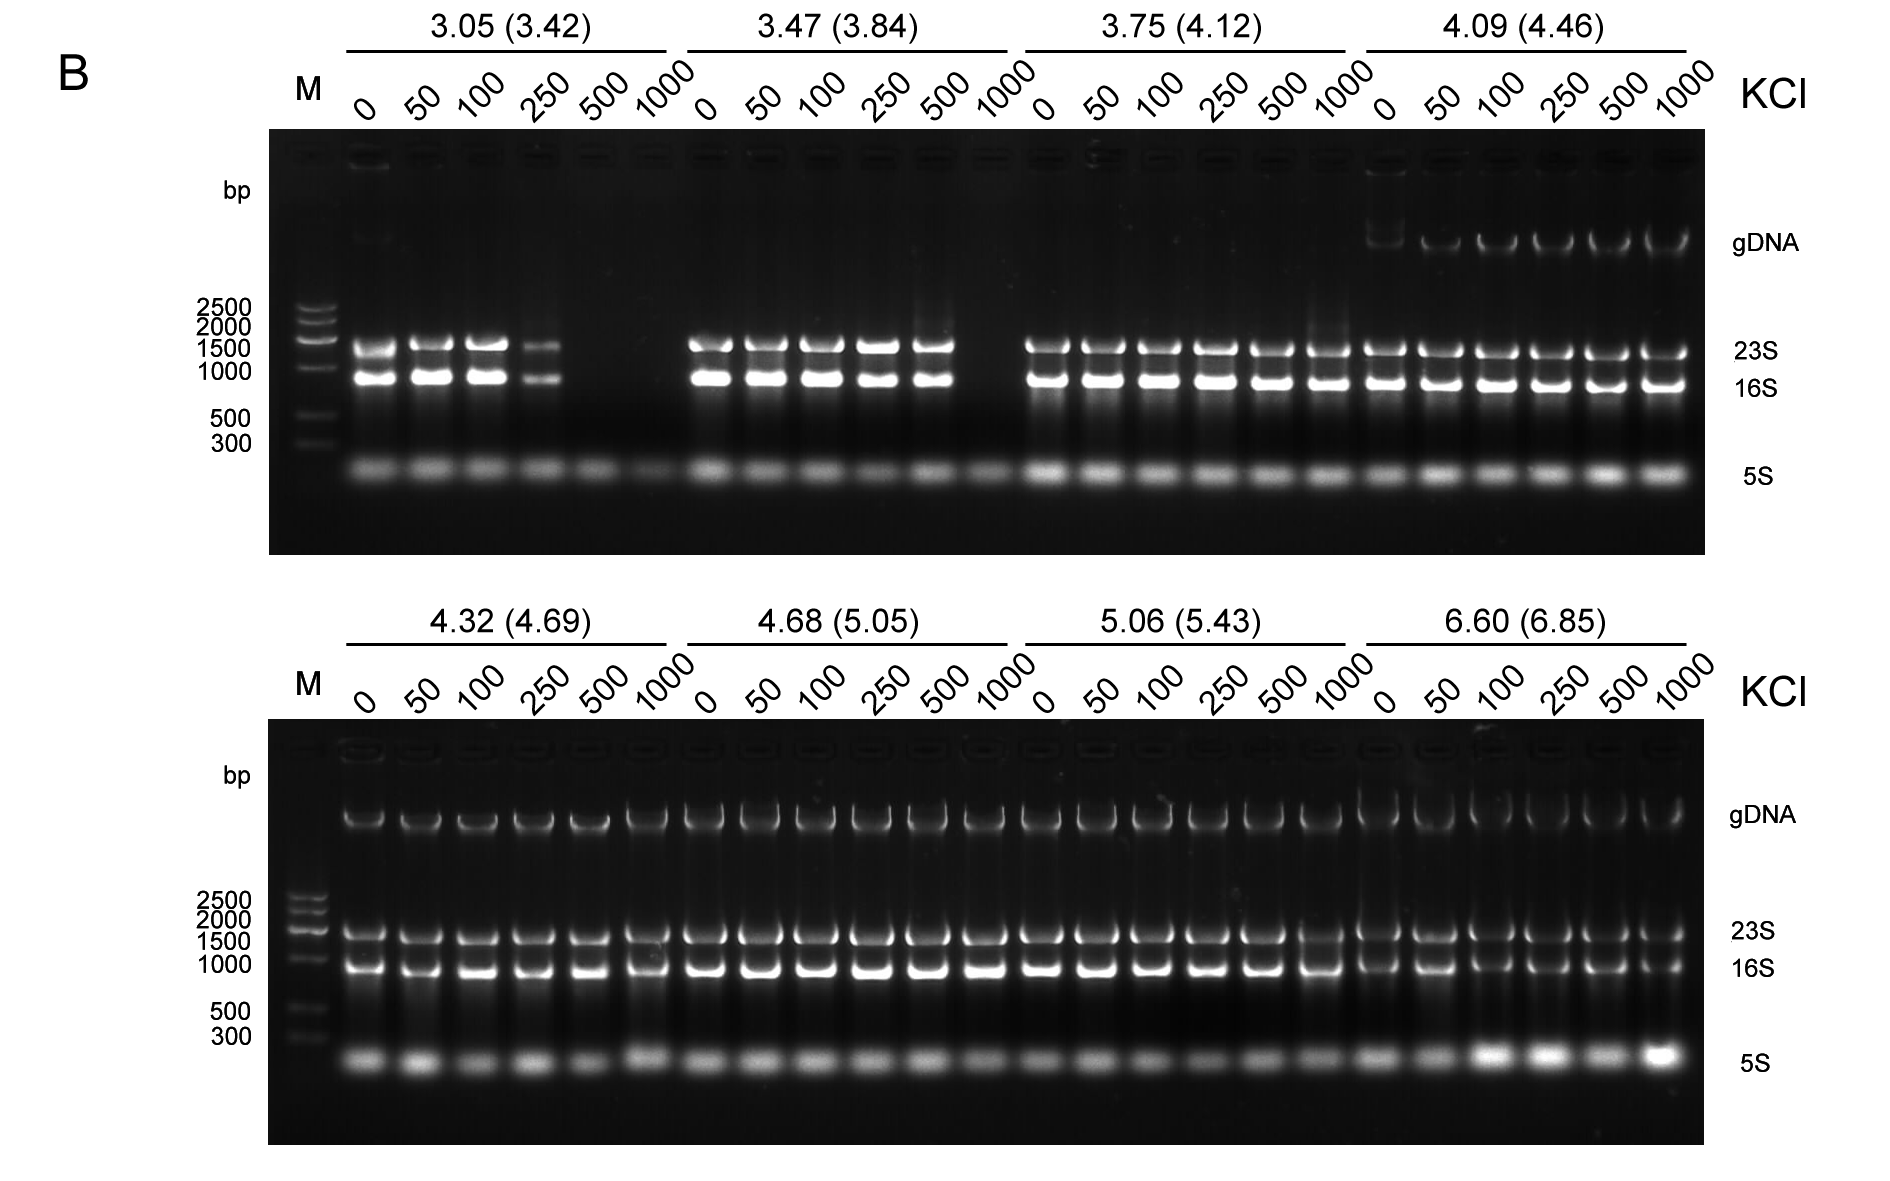


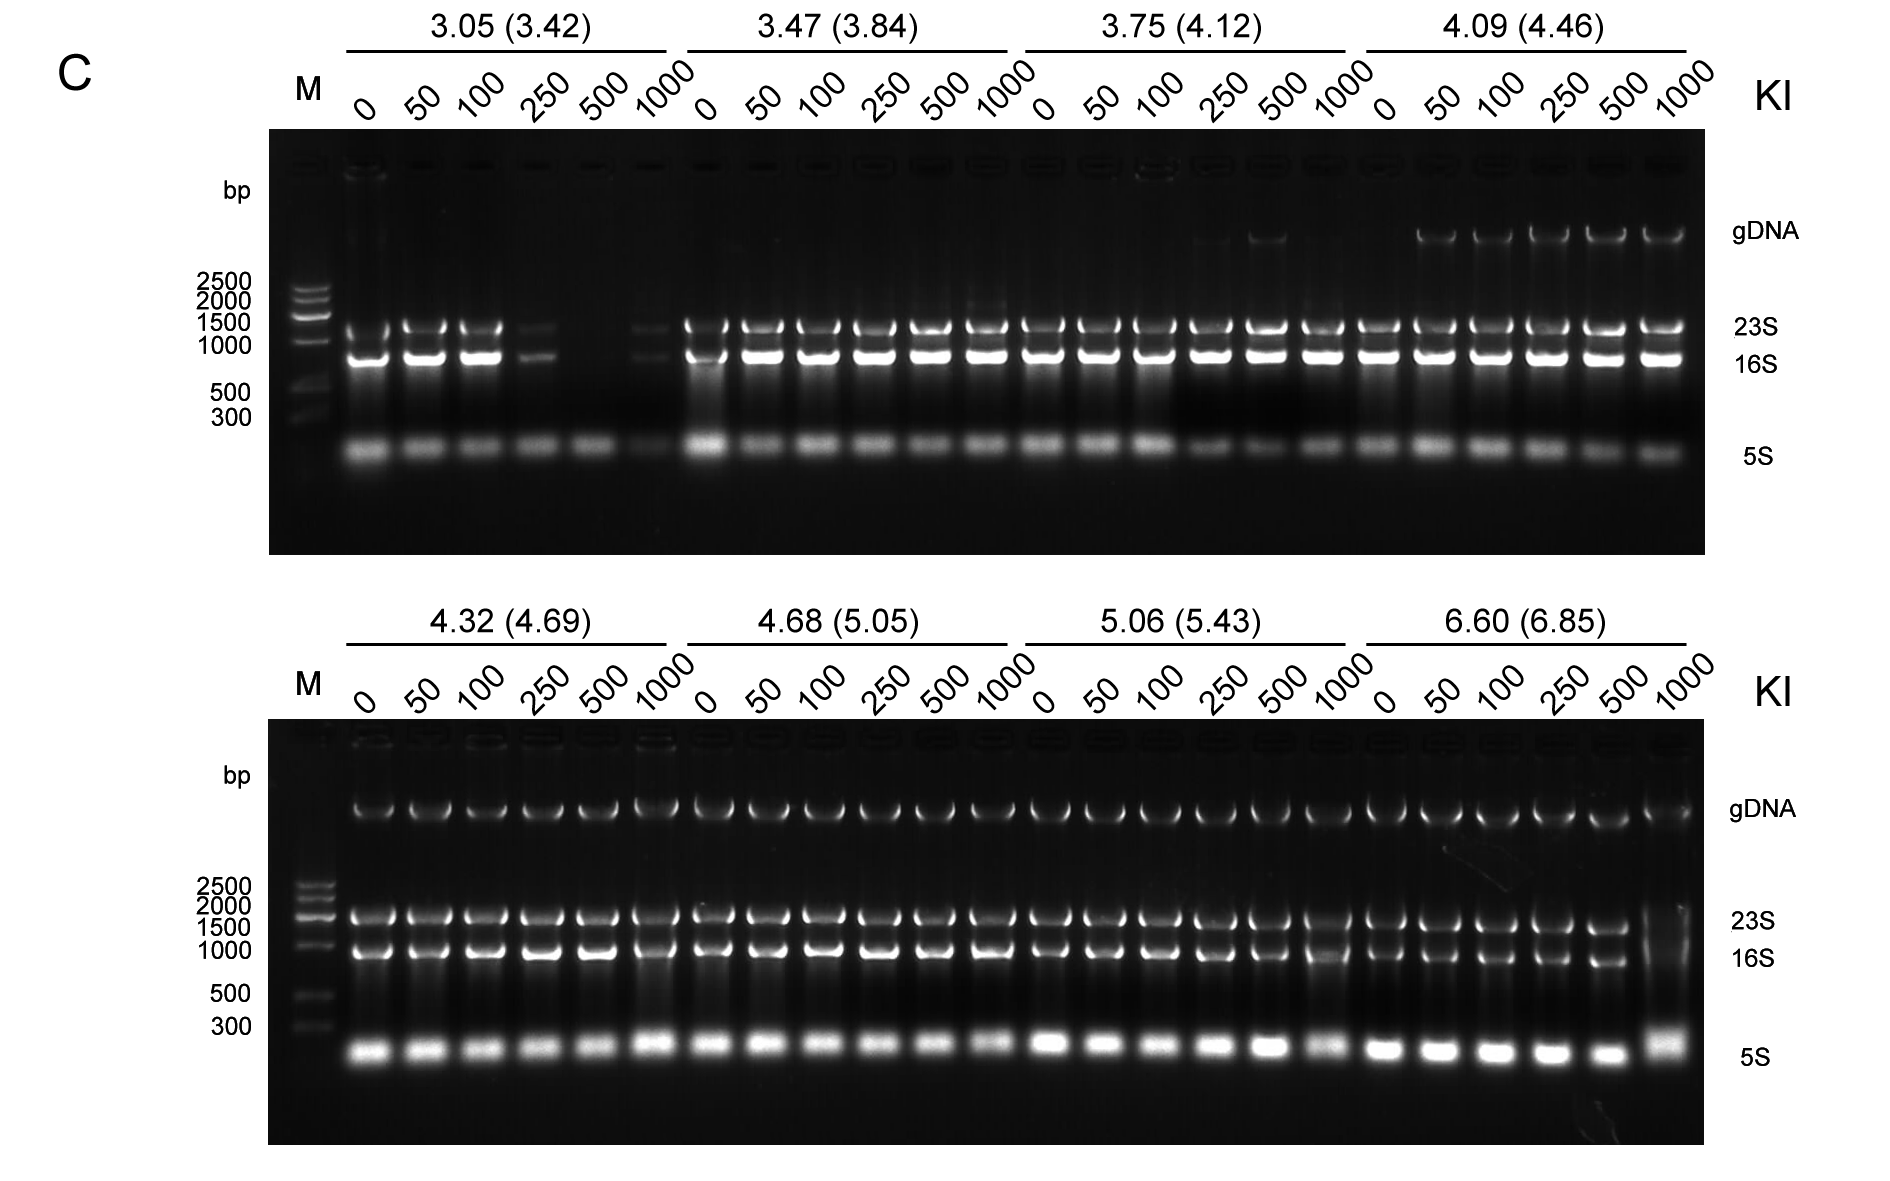


**Fig. S1** The effects of (A) NaBr, (B) KCl, and (C) KI on the nucleic acid partitioning during phenol extraction at different pH. The nucleic acid sample was supplemented with 50 mM NaAc-HAc buffer at pH0 and a certain concentration of the salt (0 - 1 M), and mixed with an equal volume of the water-saturated phenol-chloroform-isoamyl alcohol (125:24:1). The nucleic acids retained in the aqueous phase were isolated and analyzed by 1.5% agarose electrophoresis. The equilibrated pH of the aqueous phase had been predetermined as pH1. The concentration of salts used (mM) was shown on the top of each lane, and the pH0 and pH1 values were shown above the horizontal lines as "pH0 (pH1)". Lanes M were the DNA markers. The positions of the genomic DNA (gDNA), 23S, 16S, and 5S rRNAs were shown at right.


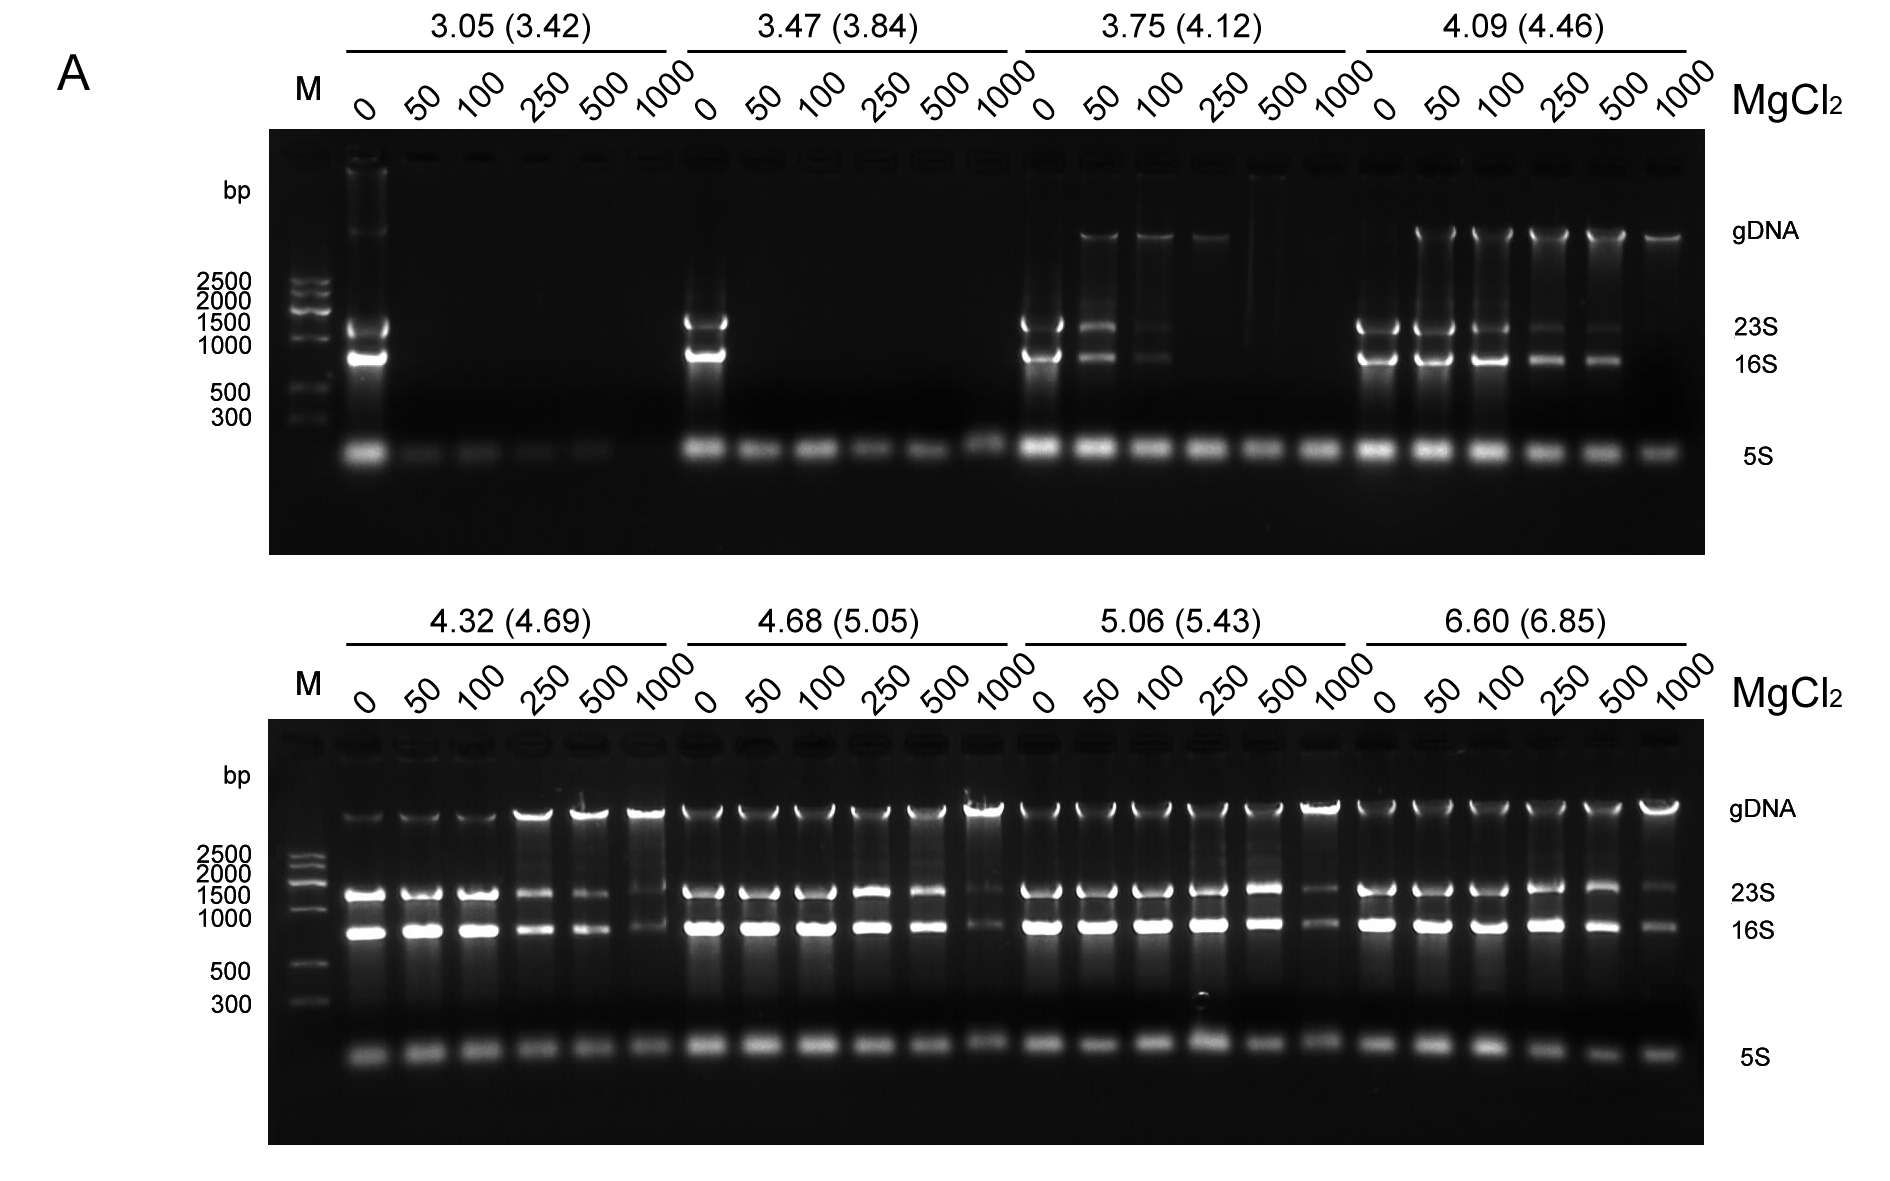


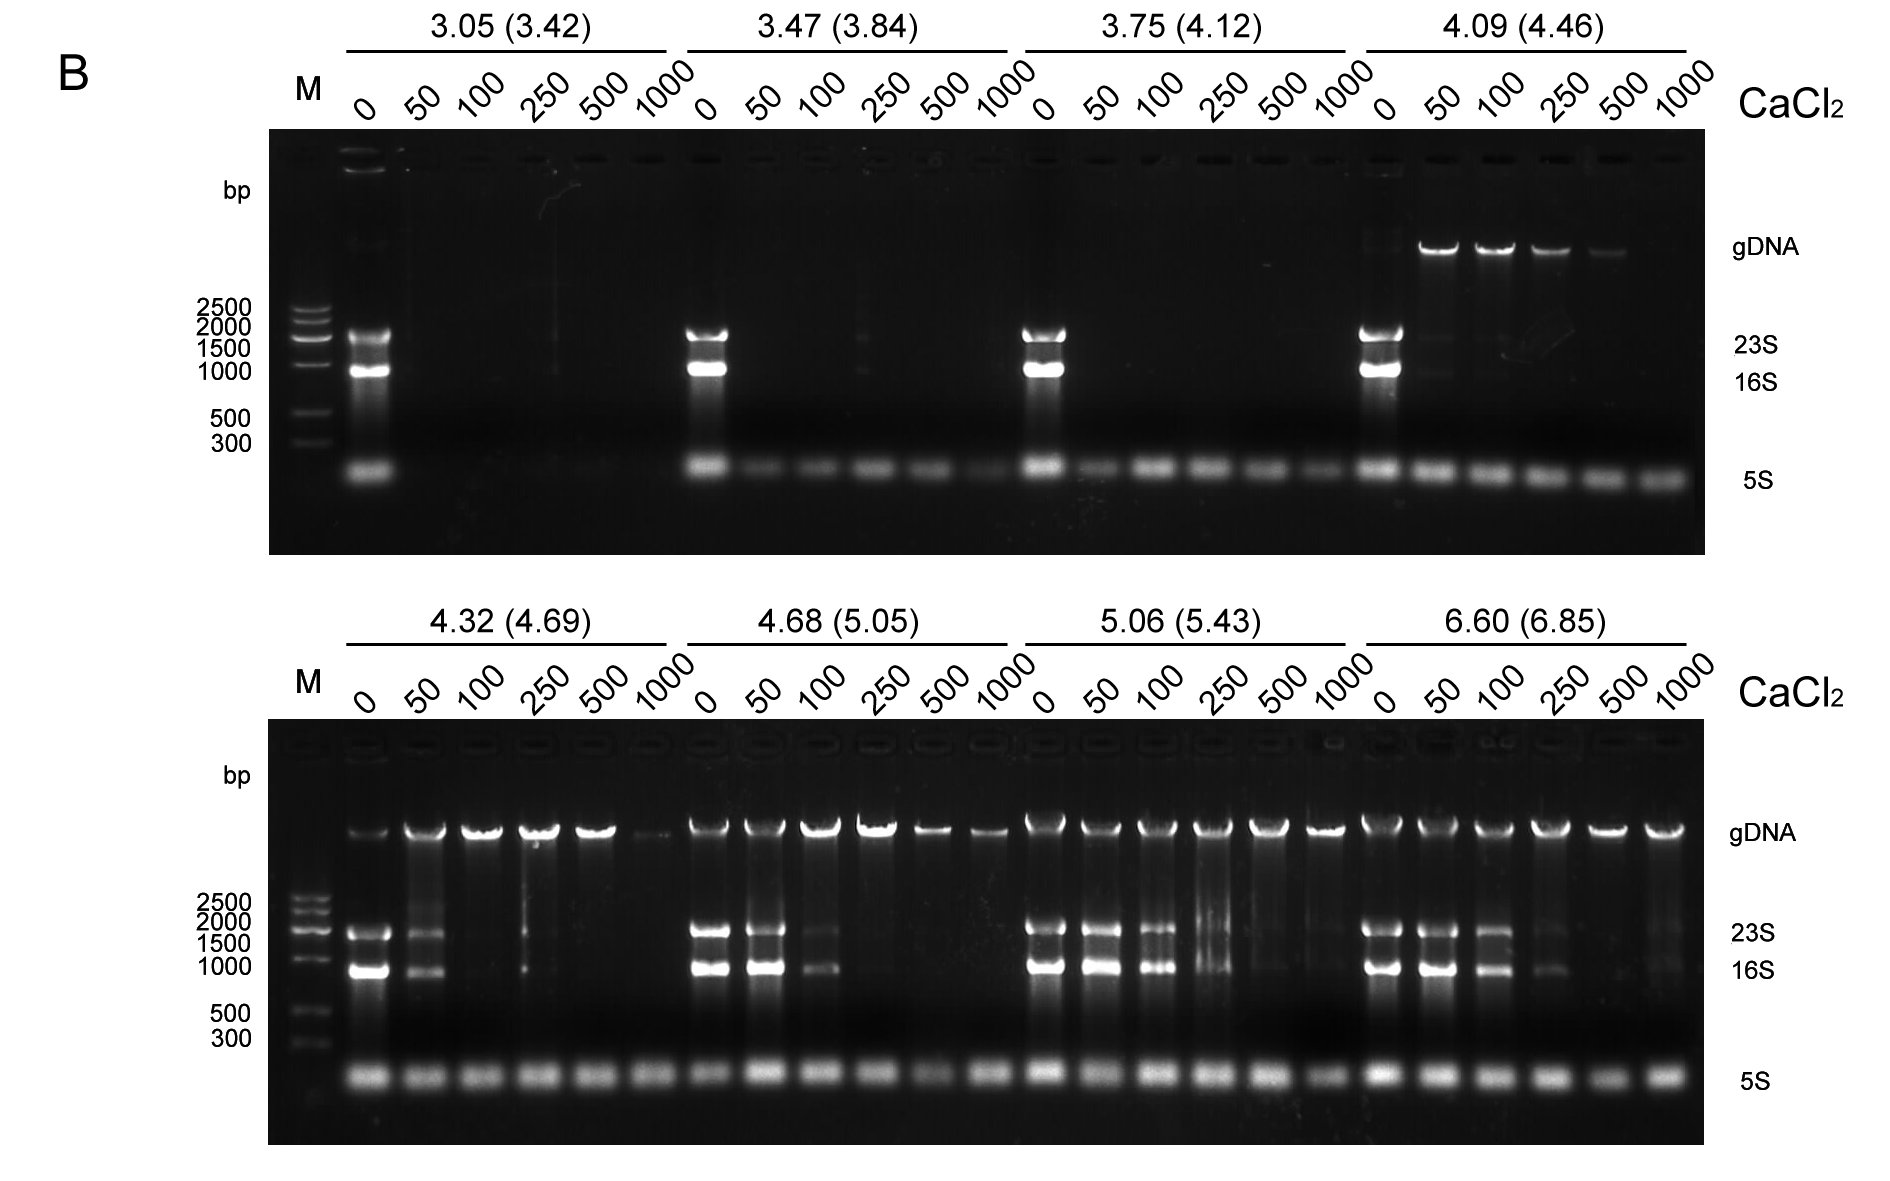


**Fig. S2** The effects of (A) MgCl2, and (B) CaCl2 on the nucleic acid partitioning during phenol extraction at different pH. The nucleic acid sample was supplemented with 50 mM NaAc-HAc buffer at pH0 and a certain concentration of the salt (0 - 1 M), and mixed with an equal volume of the water-saturated phenol-chloroform-isoamyl alcohol (125:24:1). The nucleic acids retained in the aqueous phase were isolated and analyzed by 1.5% agarose electrophoresis. The equilibrated pH of the aqueous phase had been predetermined as pH1. The concentration of salts used (mM) was shown on the top of each lane, and the pH0 and pH1 values were shown above the horizontal lines as "pH0 (pH1)". Lanes M were the DNA markers. The positions of the genomic DNA (gDNA), 23S, 16S, and 5S rRNAs were shown at right.

**Table S1** The ratios of the buffer components, the effect of dilution on the pH, and the equilibrated pH values of aqueous phase during phenol extraction of the NaAc-HAc buffer.

| NaAc:HAc | pH typea | Concentration (mM) | | | | | |
| --- | --- | --- | --- | --- | --- | --- | --- |
| 750 | 500 | 250 | 100 | 50 | 10 |
| 1:99 | pH0 | 2.67 | 2.75 | 2.84 | 2.97 | 3.08 | 3.35 |
| pH1 | 3.12 | 3.16 | 3.23 | 3.34 | 3.45 | 3.73 |
| pH1 - pH0 | 0.45 | 0.41 | 0.39 | 0.37 | 0.37 | 0.38 |
| 5:95 | pH0 | 3.34 | 3.38 | 3.41 | 3.44 | 3.49 | 3.61 |
| pH1 | 3.78 | 3.78 | 3.83 | 3.81 | 3.86 | 3.97 |
| pH1 - pH0 | 0.44 | 0.40 | 0.42 | 0.37 | 0.37 | 0.36 |
| 10:90 | pH0 | 3.64 | 3.67 | 3.70 | 3.72 | 3.75 | 3.80 |
| pH1 | 4.08 | 4.07 | 4.11 | 4.11 | 4.12 | 4.17 |
| pH1 - pH0 | 0.44 | 0.40 | 0.41 | 0.39 | 0.37 | 0.37 |
| 20:80 | pH0 | 3.99 | 4.00 | 4.02 | 4.05 | 4.07 | 4.11 |
| pH1 | 4.41 | 4.39 | 4.43 | 4.42 | 4.44 | 4.47 |
| pH1 - pH0 | 0.44 | 0.40 | 0.42 | 0.37 | 0.37 | 0.36 |
| 30:70 | pH0 | 4.23 | 4.23 | 4.24 | 4.26 | 4.29 | 4.32 |
| pH1 | 4.64 | 4.62 | 4.65 | 4.64 | 4.66 | 4.69 |
| pH1 - pH0 | 0.41 | 0.39 | 0.41 | 0.38 | 0.37 | 0.37 |
| 50:50 | pH0 | 4.62 | 4.62 | 4.62 | 4.63 | 4.65 | 4.70 |
| pH1 | 5.01 | 5.00 | 5.03 | 5.00 | 5.02 | 5.06 |
| pH1 - pH0 | 0.39 | 0.38 | 0.41 | 0.37 | 0.37 | 0.36 |
| 70:30 | pH0 | 5.02 | 4.98 | 4.98 | 4.99 | 5.01 | 5.05 |
| pH1 | 5.32 | 5.33 | 5.35 | 5.36 | 5.36 | 5.41 |
| pH1 - pH0 | 0.30 | 0.35 | 0.37 | 0.37 | 0.35 | 0.36 |
| 95:5 | pH0 | 5.99 | 5.93 | 5.91 | 5.93 | 5.93 | 5.97 |
| pH1 | 6.30 | 6.29 | 6.26 | 6.25 | 6.24 | 6.21 |
| pH1 - pH0 | 0.31 | 0.36 | 0.35 | 0.32 | 0.31 | 0.24 |

a pH types were: pH0, the original pH of the buffer; pH1, the equilibrated pH of aqueous phase.

**Table S2** The ratios of the buffer components, the effect of dilution on the pH, and the equilibrated pH values of aqueous phase during phenol extraction of the sodium citrate buffer.

| Na3Cit:H3Cit | pH typea | Concentration (mM) | | | | | |
| --- | --- | --- | --- | --- | --- | --- | --- |
| 750 | 500 | 250 | 100 | 50 | 10 |
| 30:70 | pH0 | 3.29 | 3.33 | 3.39 | 3.44 | 3.50 | 3.58 |
| pH1 | 3.49 | 3.47 | 3.56 | 3.60 | 3.61 | 3.70 |
| pH1 - pH0 | 0.20 | 0.14 | 0.17 | 0.16 | 0.11 | 0.12 |
| 40:60 | pH0 | 3.71 | 3.75 | 3.81 | 3.87 | 3.94 | 4.06 |
| pH1 | 3.91 | 3.86 | 3.95 | 3.98 | 4.03 | 4.18 |
| pH1 - pH0 | 0.20 | 0.11 | 0.14 | 0.11 | 0.09 | 0.12 |
| 50:50 | pH0 | 4.04 | 4.10 | 4.18 | 4.29 | 4.38 | 4.50 |
| pH1 | 4.24 | 4.19 | 4.32 | 4.35 | 4.42 | 4.61 |
| pH1 - pH0 | 0.20 | 0.09 | 0.14 | 0.06 | 0.04 | 0.11 |
| 60:40 | pH0 | 4.43 | 4.40 | 4.45 | 4.54 | 4.69 | 4.90 |
| pH1 | 4.56 | 4.51 | 4.58 | 4.63 | 4.75 | 4.98 |
| pH1 - pH0 | 0.13 | 0.11 | 0.13 | 0.09 | 0.06 | 0.08 |
| 70:30 | pH0 | 4.72 | 4.75 | 4.85 | 4.99 | 5.13 | 5.37 |
| pH1 | 4.78 | 4.85 | 4.94 | 5.08 | 5.26 | 5.51 |
| pH1 - pH0 | 0.06 | 0.10 | 0.09 | 0.09 | 0.13 | 0.14 |
| 80:20 | pH0 | 5.14 | 5.15 | 5.20 | 5.36 | 5.37 | 5.55 |
| pH1 | 5.14 | 5.21 | 5.30 | 5.49 | 5.47 | 5.67 |
| pH1 - pH0 | 0.00 | 0.06 | 0.10 | 0.13 | 0.10 | 0.12 |
| 90:10 | pH0 | 5.59 | 5.67 | 5.70 | 5.83 | 5.95 | 6.01 |
| pH1 | 5.64 | 5.70 | 5.79 | 5.94 | 6.09 | 6.13 |
| pH1 - pH0 | 0.05 | 0.03 | 0.09 | 0.11 | 0.14 | 0.12 |
| 99:1 | pH0 | 6.71 | 6.77 | 6.80 | 6.88 | 6.95 | 7.09 |
| pH1 | 6.80 | 6.89 | 6.81 | 6.82 | 6.82 | 6.71 |
| pH1 - pH0 | 0.11 | 0.12 | 0.01 | -0.06 | -0.13 | -0.38 |

a pH types were: pH0, the original pH of the buffer; pH1, the equilibrated pH of aqueous phase.

**Table S3** The ratios of the buffer components, the effect of dilution on the pH, and the equilibrated pH values of aqueous phase during phenol extraction of the sodium phosphate buffer.

| Na2HPO4:H3PO4 | pH typea | Concentration (mM) | | | | | |
| --- | --- | --- | --- | --- | --- | --- | --- |
| 750 | 500 | 250 | 100 | 50 | 10 |
| 900:1100 | pH0 | 2.80 | 2.86 | 2.87 | 2.89 | 3.00 | 3.16 |
| pH1 | 2.85 | 2.97 | 2.95 | 2.97 | 3.05 | 3.26 |
| pH1 - pH0 | 0.05 | 0.11 | 0.08 | 0.08 | 0.05 | 0.10 |
| 950:1050 | pH0 | 3.15 | 3.22 | 3.23 | 3.26 | 3.36 | 3.60 |
| pH1 | 3.17 | 3.32 | 3.35 | 3.32 | 3.42 | 3.70 |
| pH1 - pH0 | 0.02 | 0.10 | 0.12 | 0.06 | 0.06 | 0.10 |
| 975:1025 | pH0 | 3.56 | 3.71 | 3.72 | 3.76 | 3.86 | 4.11 |
| pH1 | 3.56 | 3.76 | 3.79 | 3.81 | 3.89 | 4.19 |
| pH1 - pH0 | 0.00 | 0.05 | 0.07 | 0.05 | 0.03 | 0.08 |
| 985:1015 | pH0 | 3.89 | 4.09 | 4.15 | 4.23 | 4.32 | 4.56 |
| pH1 | 3.89 | 4.14 | 4.19 | 4.27 | 4.37 | 4.50 |
| pH1 - pH0 | 0.00 | 0.05 | 0.04 | 0.04 | 0.05 | -0.06 |
| 1000:1000 | pH0 | 4.28 | 4.59 | 4.75 | 4.90 | 4.99 | 5.23 |
| pH1 | 4.34 | 4.65 | 4.79 | 4.92 | 4.98 | 5.04 |
| pH1 - pH0 | 0.06 | 0.06 | 0.04 | 0.02 | -0.01 | -0.19 |
| 1200:800 | pH0 | 5.56 | 5.87 | 5.98 | 6.15 | 6.24 | 6.39 |
| pH1 | 5.57 | 5.92 | 6.03 | 6.14 | 6.25 | 6.27 |
| pH1 - pH0 | 0.01 | 0.05 | 0.05 | -0.01 | 0.01 | -0.12 |
| 1400:600 | pH0 | 6.10 | 6.32 | 6.42 | 6.55 | 6.63 | 6.78 |
| pH1 | 6.14 | 6.36 | 6.46 | 6.59 | 6.63 | 6.74 |
| pH1 - pH0 | 0.04 | 0.04 | 0.04 | 0.04 | 0.00 | -0.04 |
| 1600:400 | pH0 | 6.58 | 6.73 | 6.78 | 6.89 | 6.98 | 7.14 |
| pH1 | 6.61 | 6.80 | 6.82 | 6.83 | 6.96 | 6.97 |
| pH1 - pH0 | 0.03 | 0.07 | 0.04 | -0.06 | -0.02 | -0.17 |

a pH types were: pH0, the original pH of the buffer; pH1, the equilibrated pH of aqueous phase.


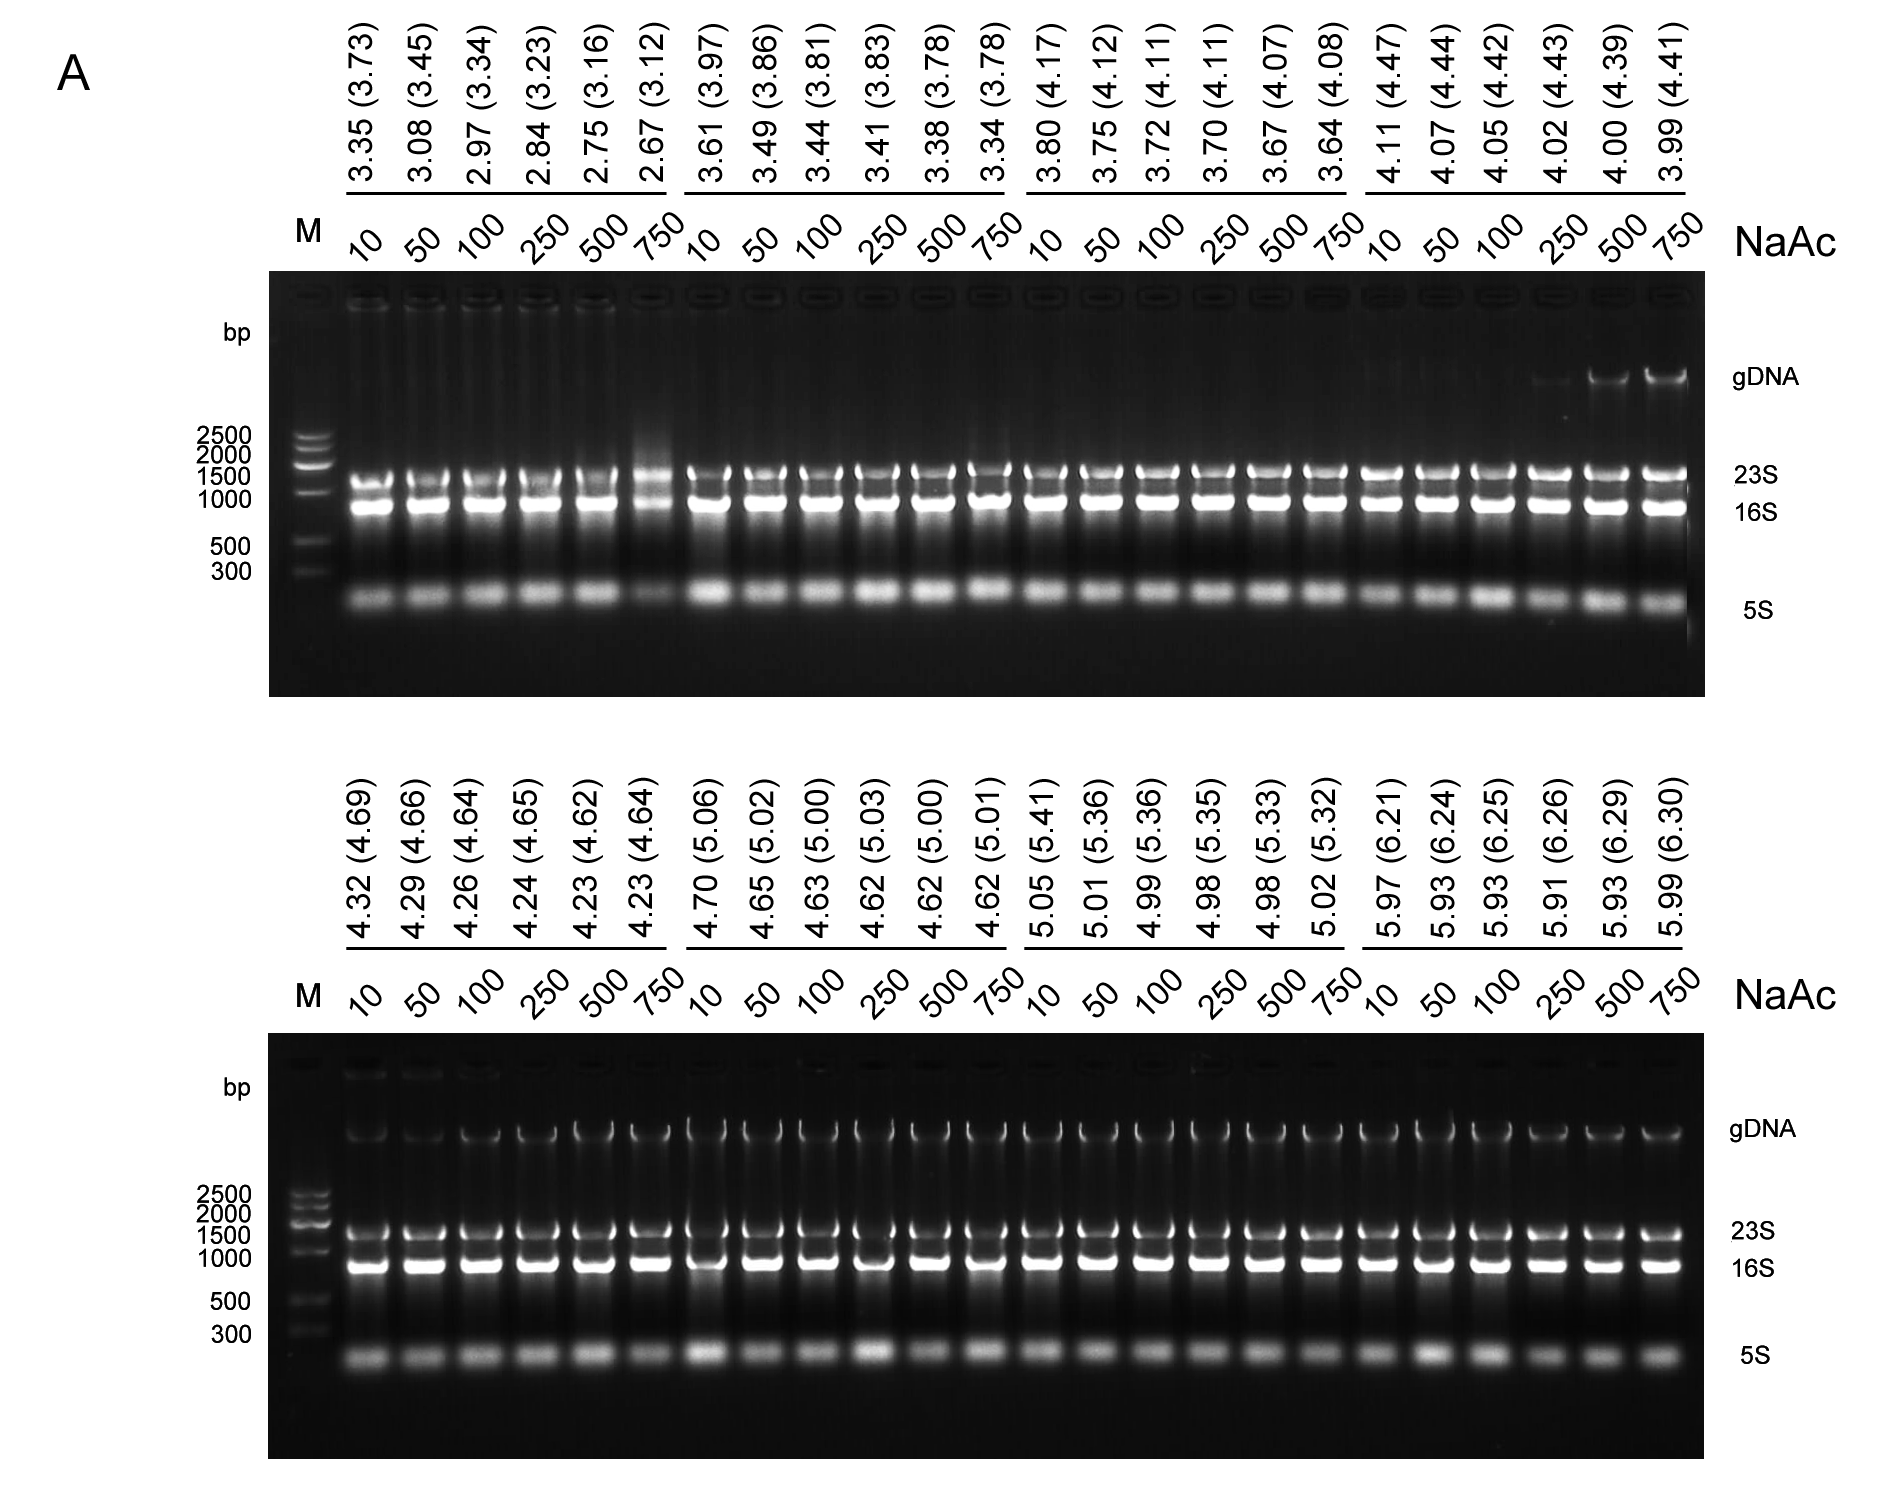

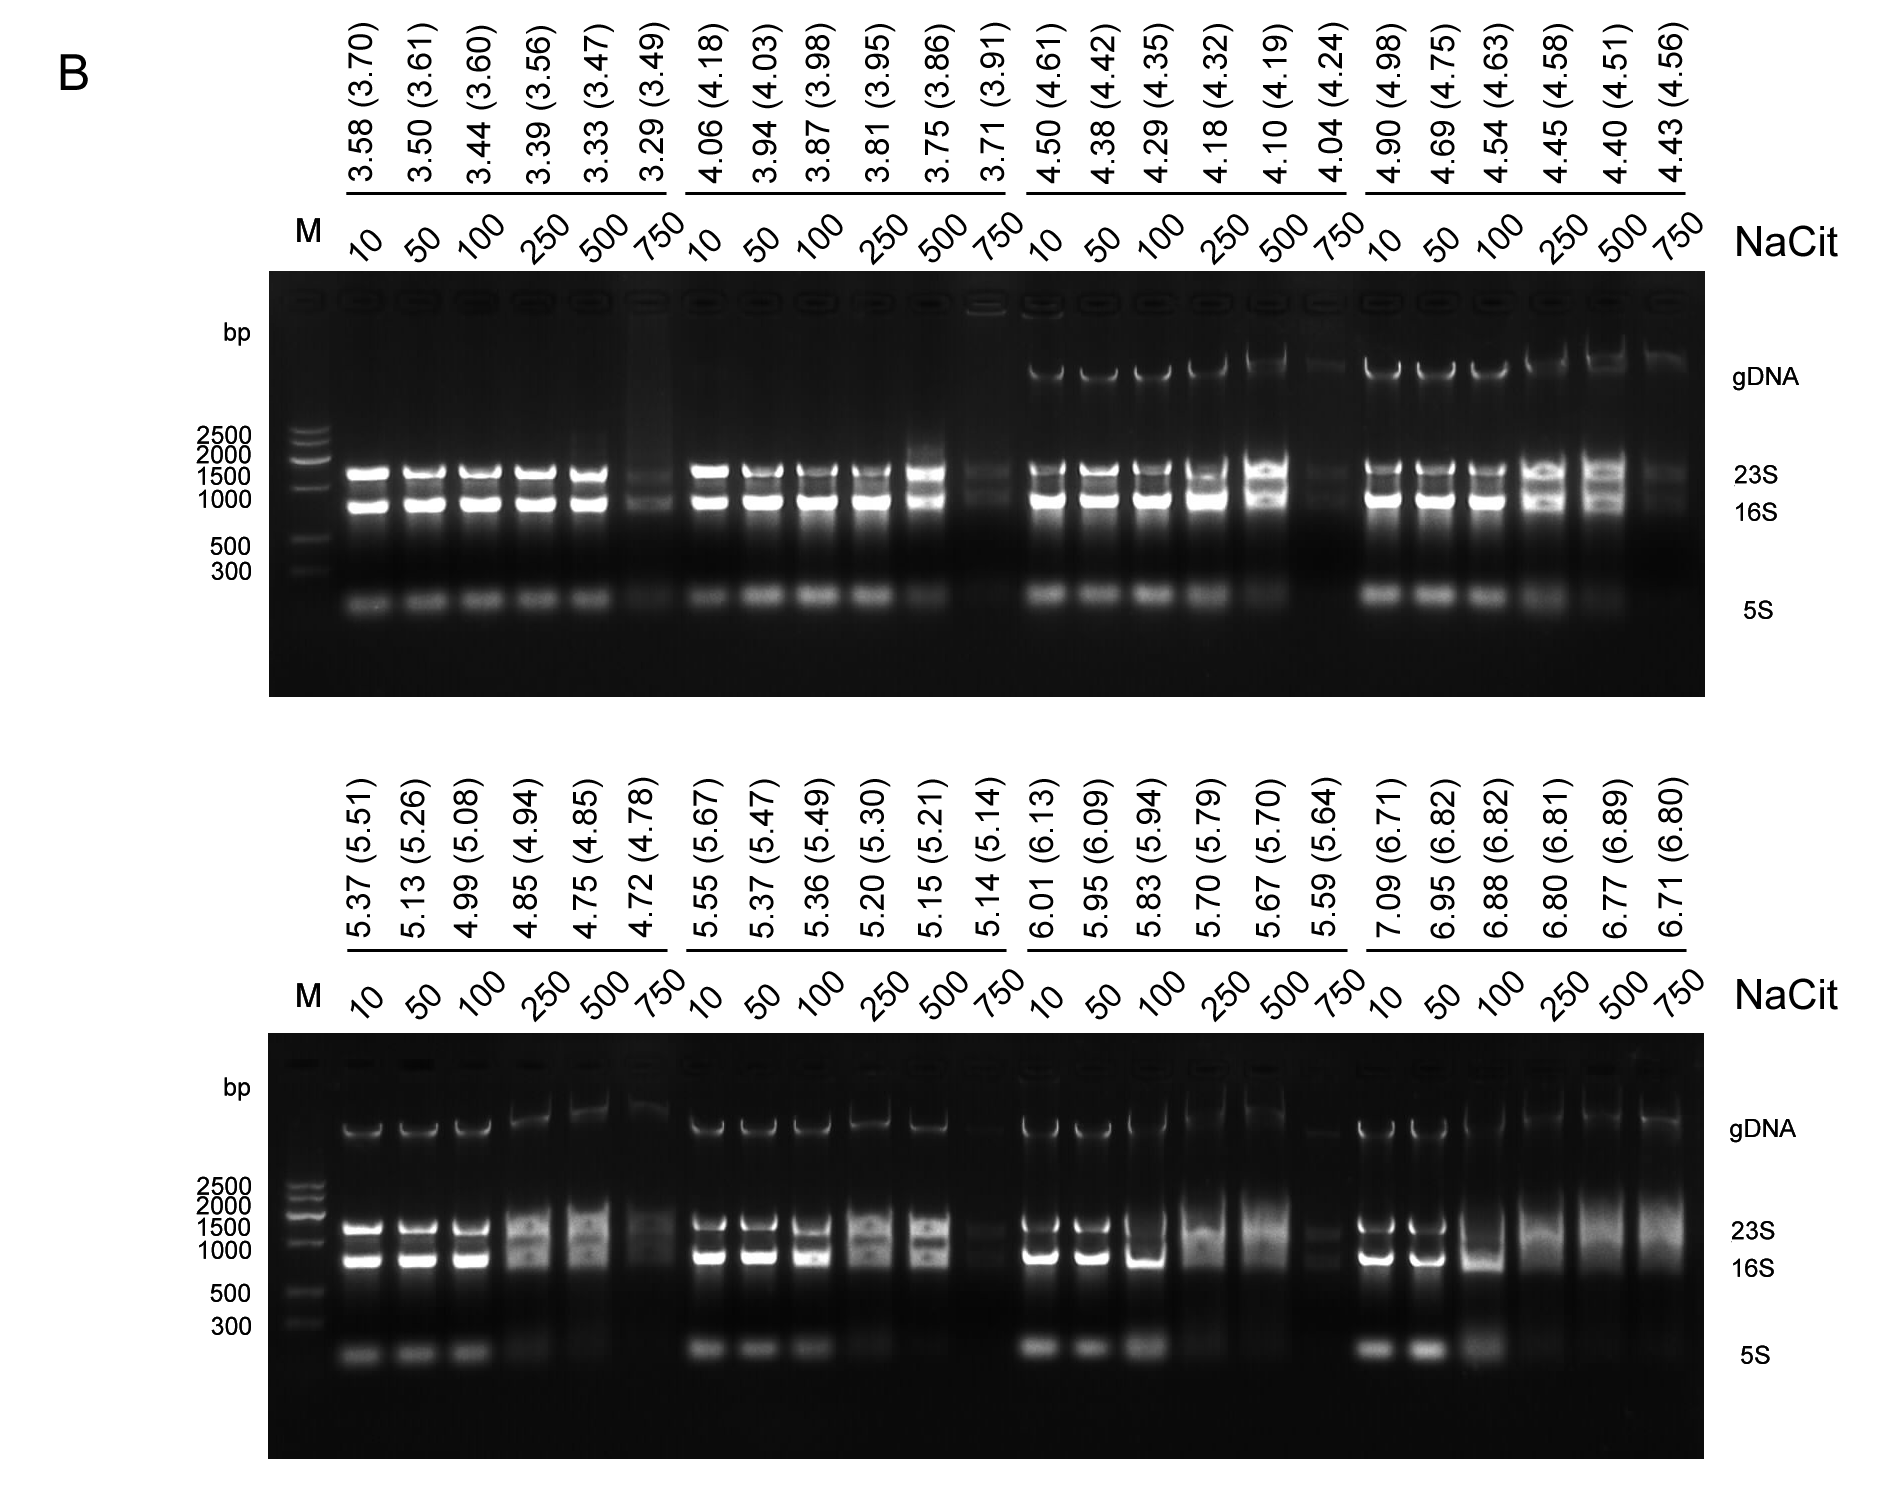

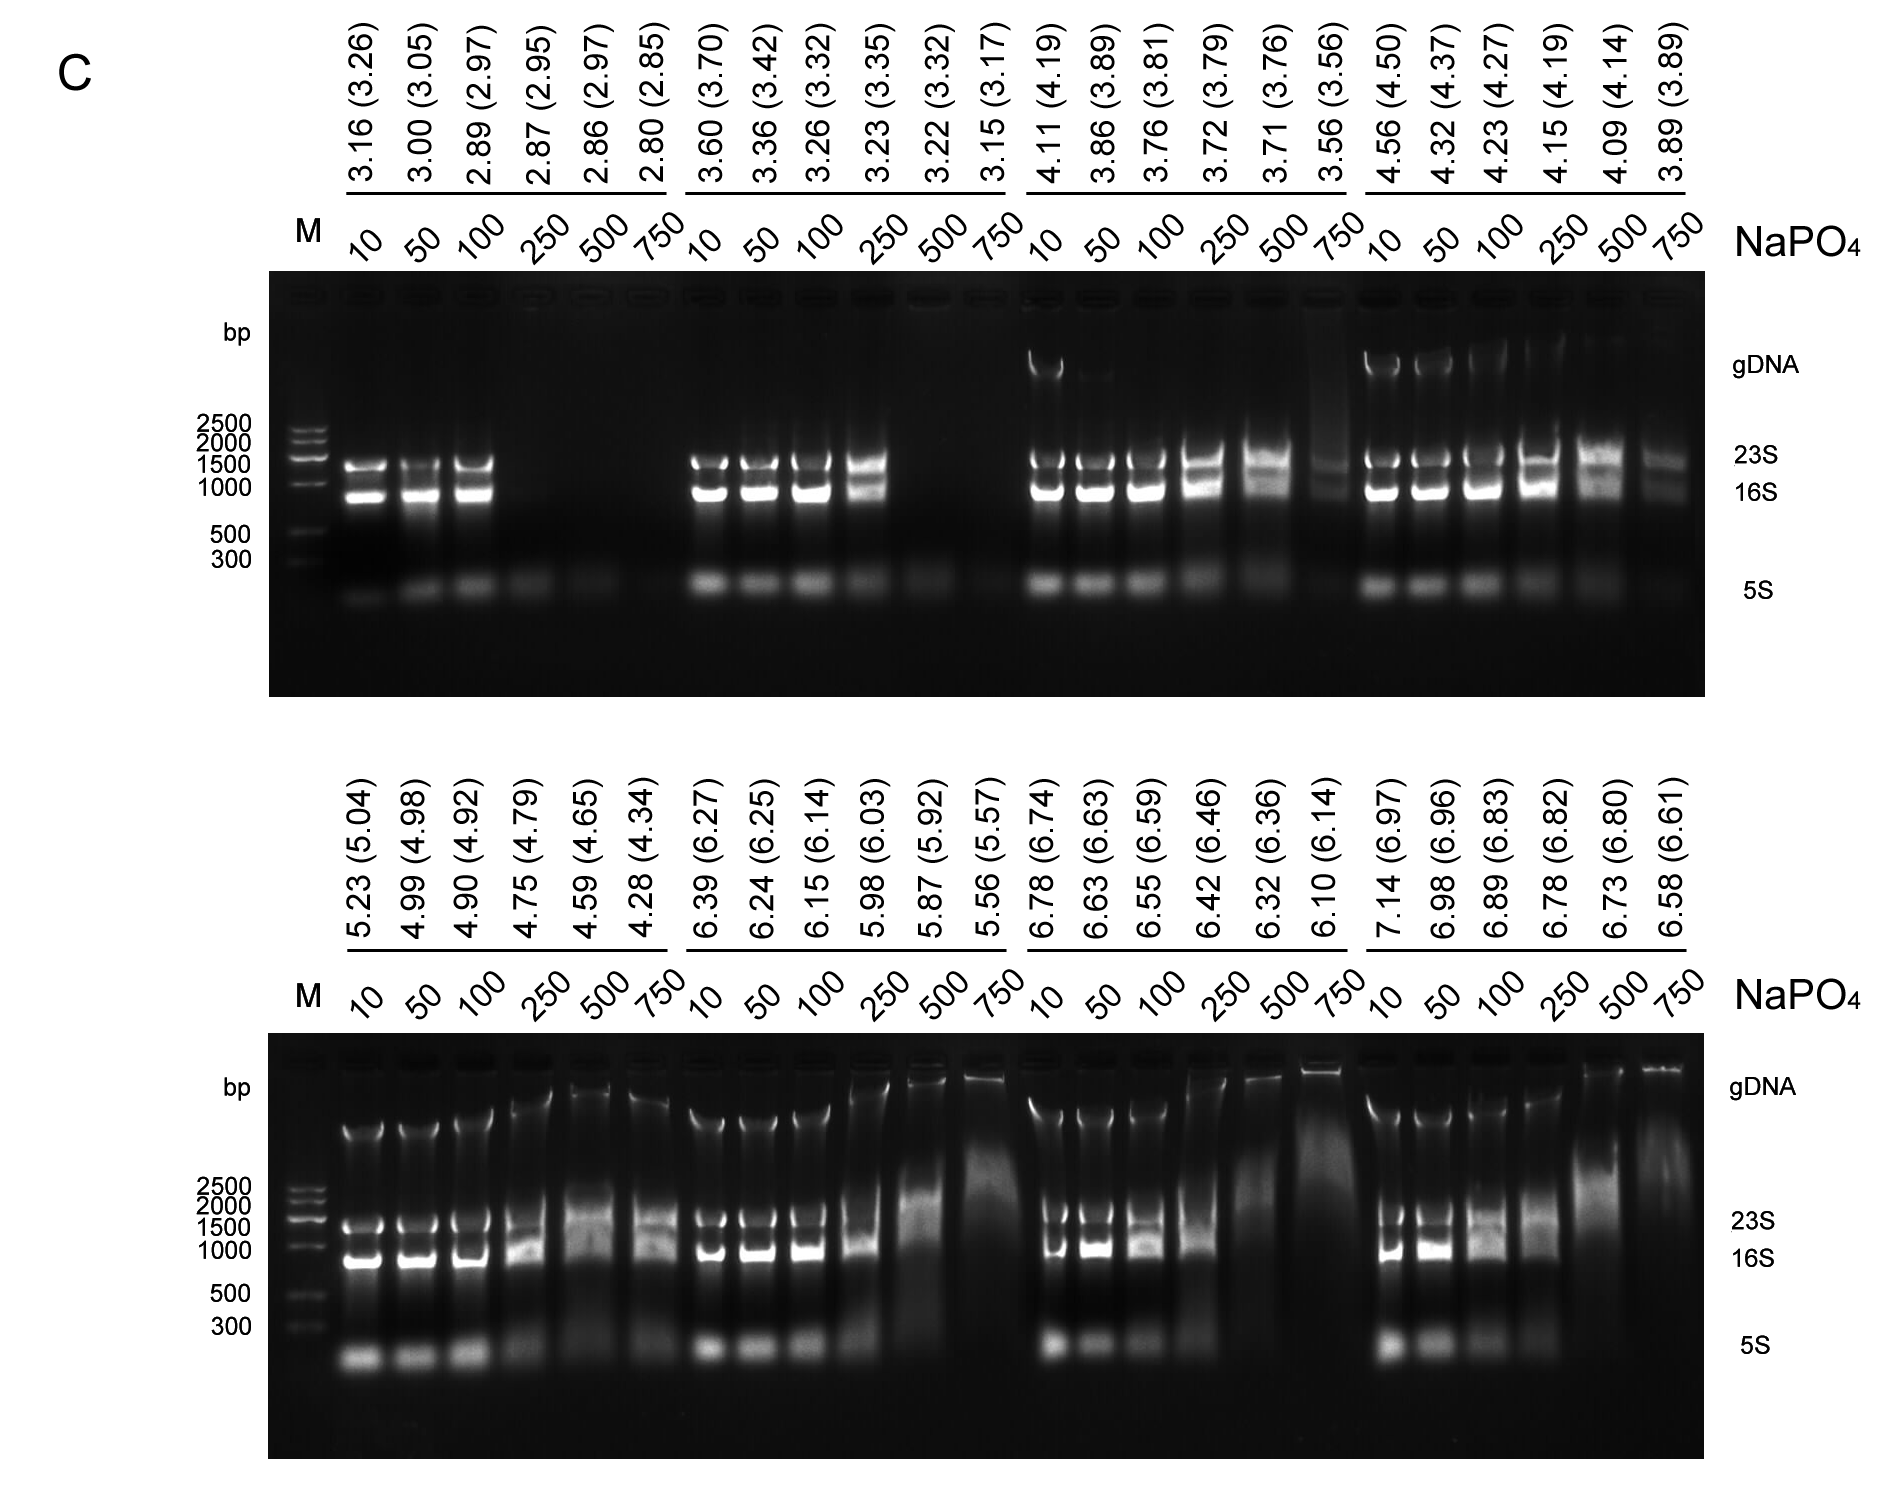
 **Fig. S3** The effects of (A) the NaAc-HAc buffer, (B) the sodium citrate buffer, and (C) the sodium phosphate buffer on the nucleic acid partitioning during phenol extraction. The nucleic acid sample was supplemented with the buffer at a certain concentration and a certain pH value (pH0), and mixed with an equal volume of the water-saturated phenol-chloroform-isoamyl alcohol (125:24:1). The nucleic acids retained in the aqueous phase were isolated and analyzed by 1.5% agarose electrophoresis. The lanes under one line were the samples which were extracted using the buffers serially diluted from an original one. The equilibrated pH of the aqueous phase had been predetermined as pH1. The concentration of the buffer used (mM) was shown on the top of each lane, and the pH0 and pH1 values were shown above the horizontal lines as "pH0 (pH1)". Lanes M were the DNA markers. The positions of the genomic DNA (gDNA), 23S, 16S, and 5S rRNAs were shown at right.


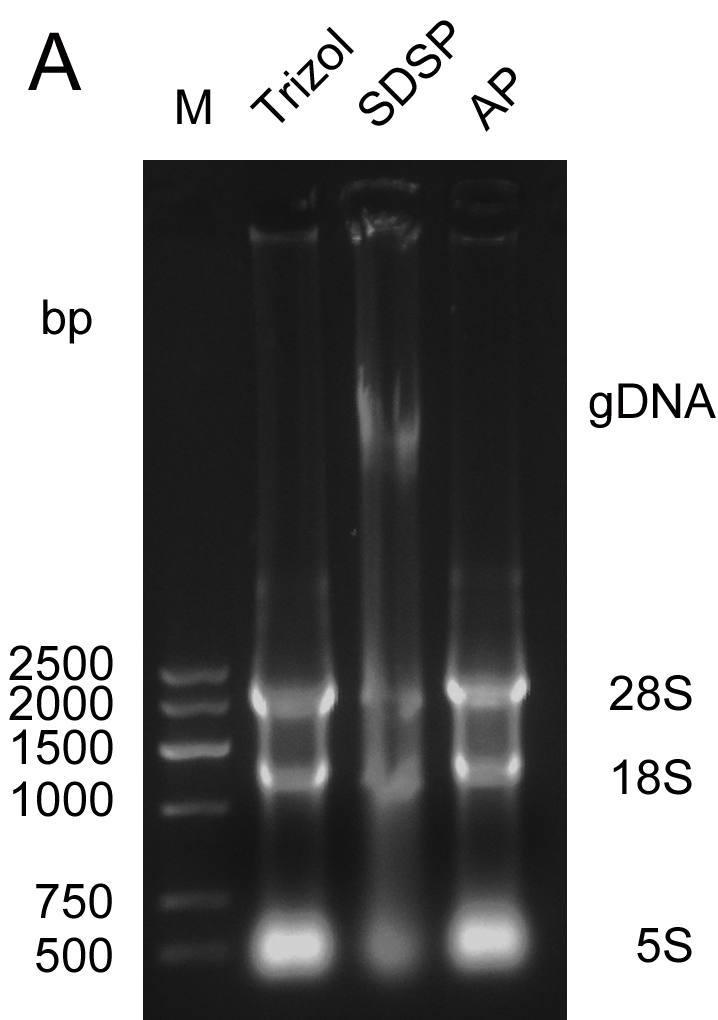


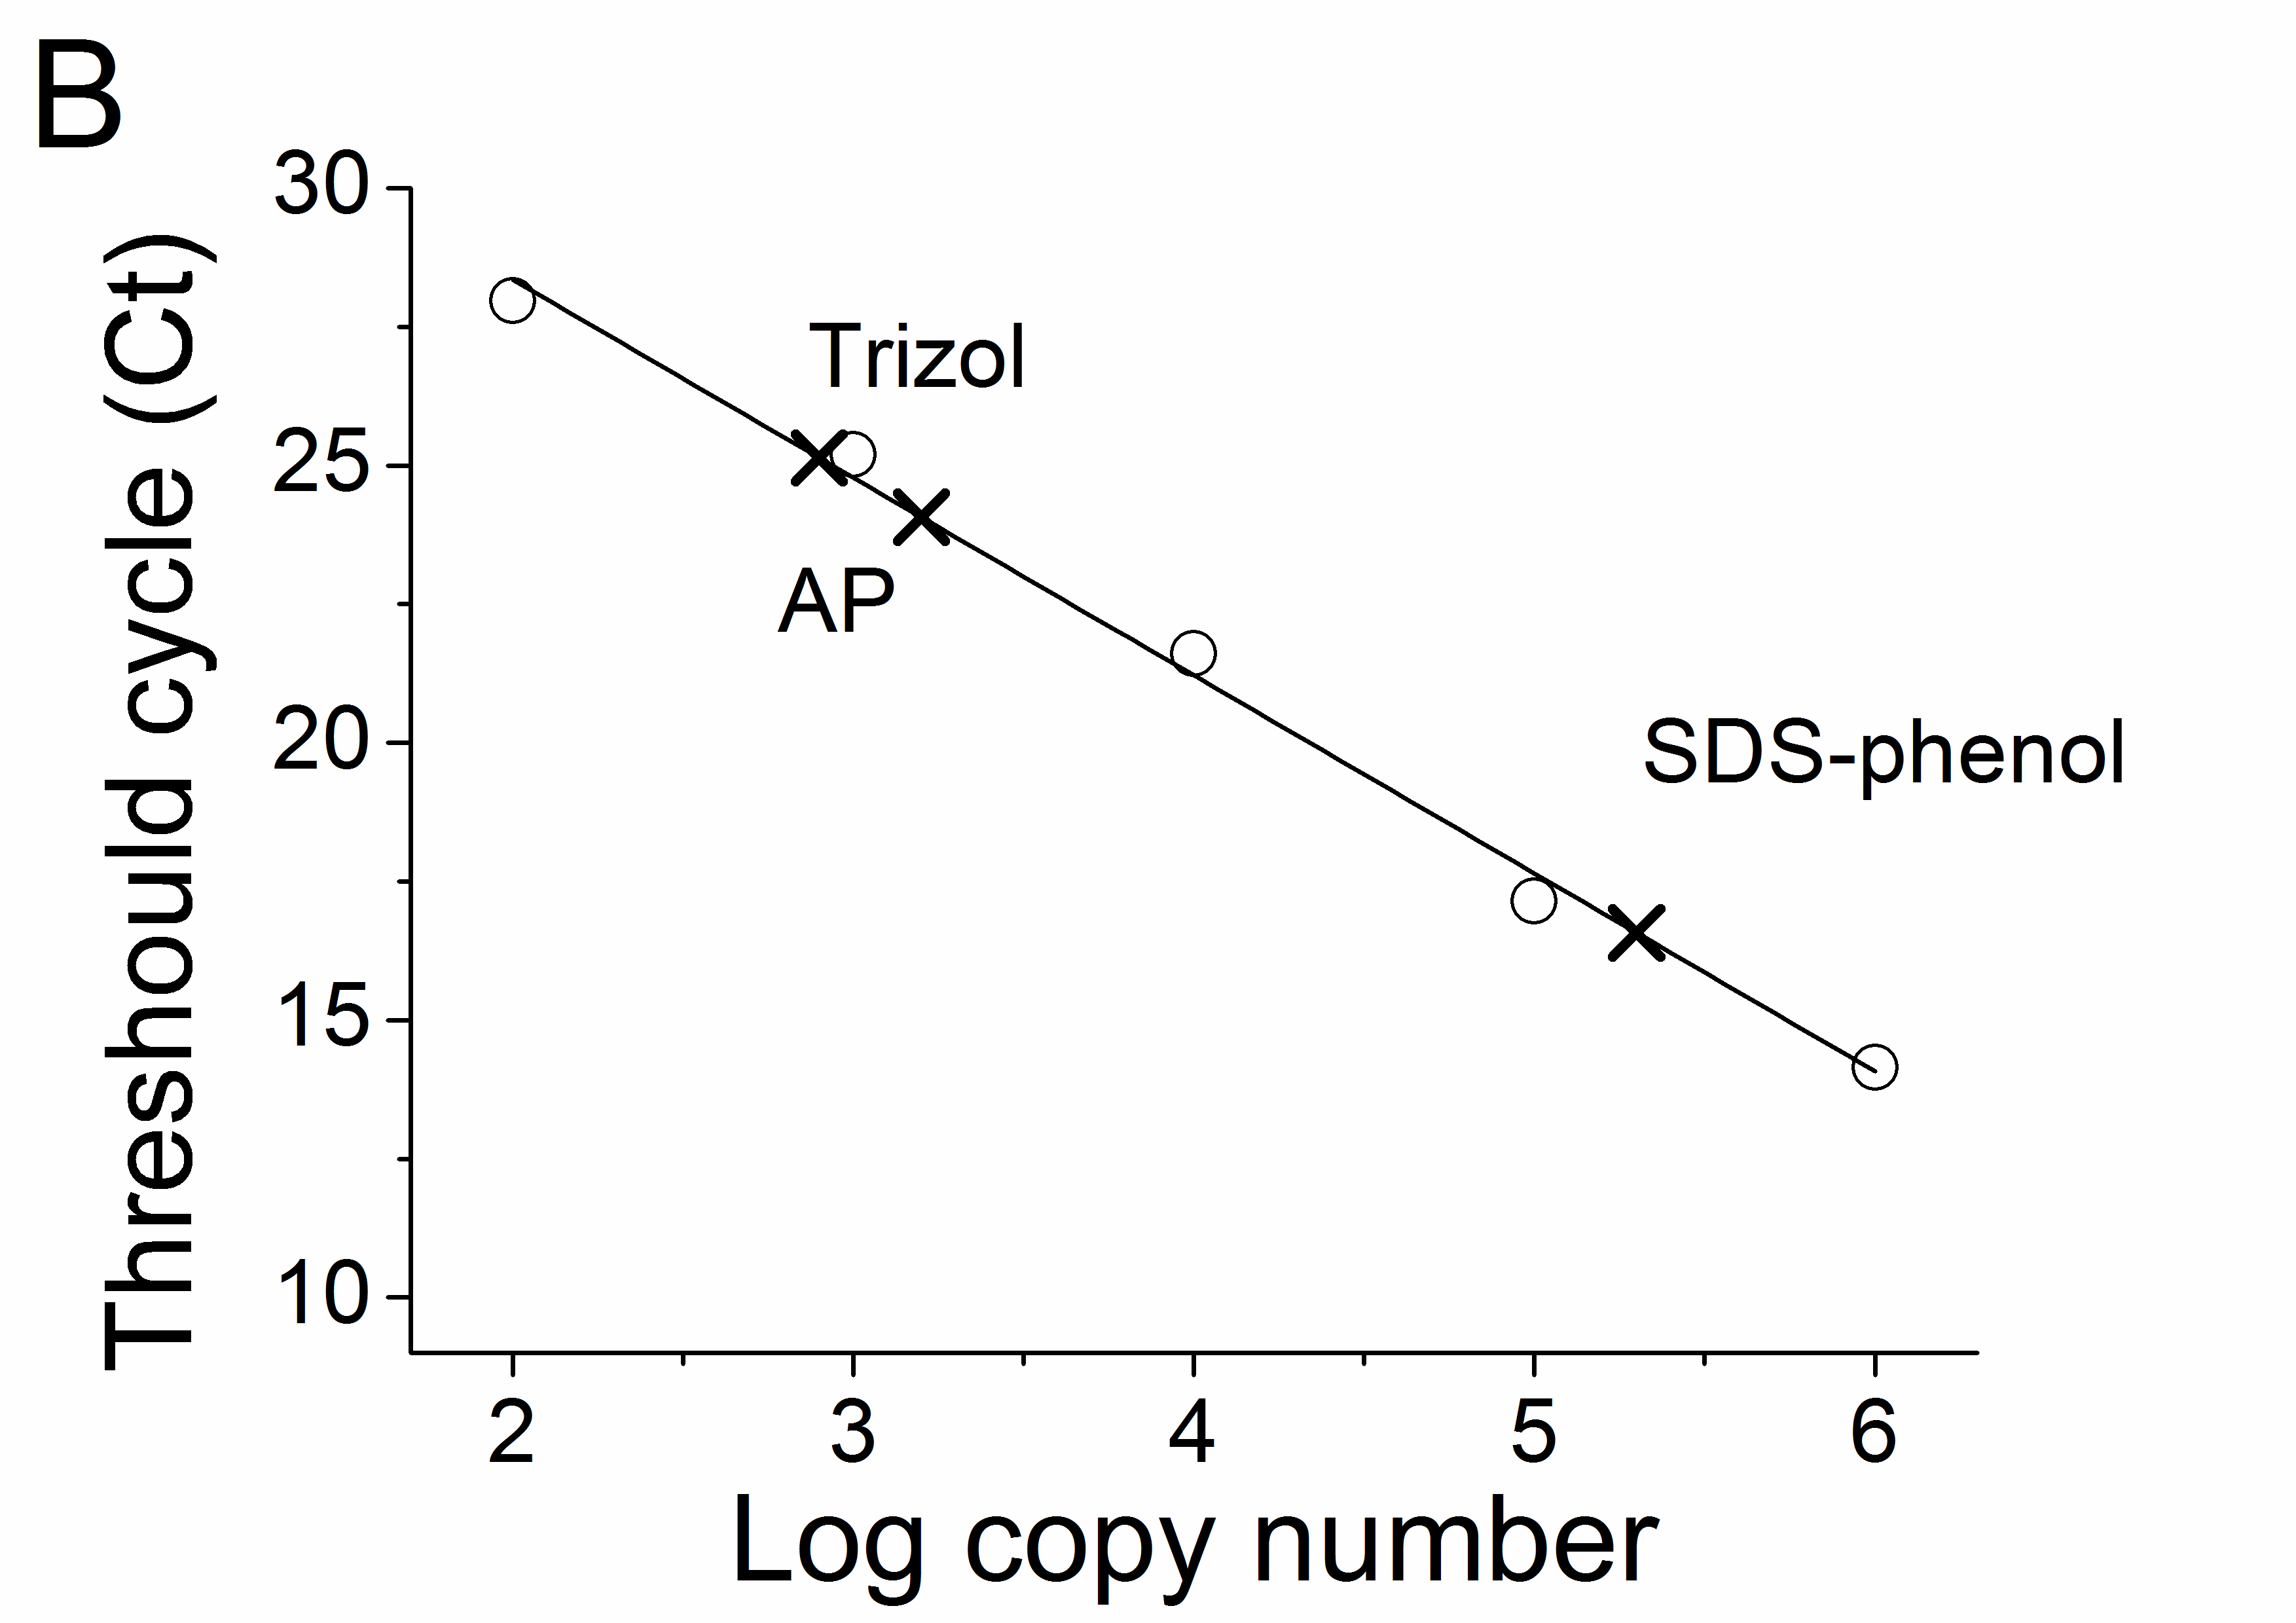


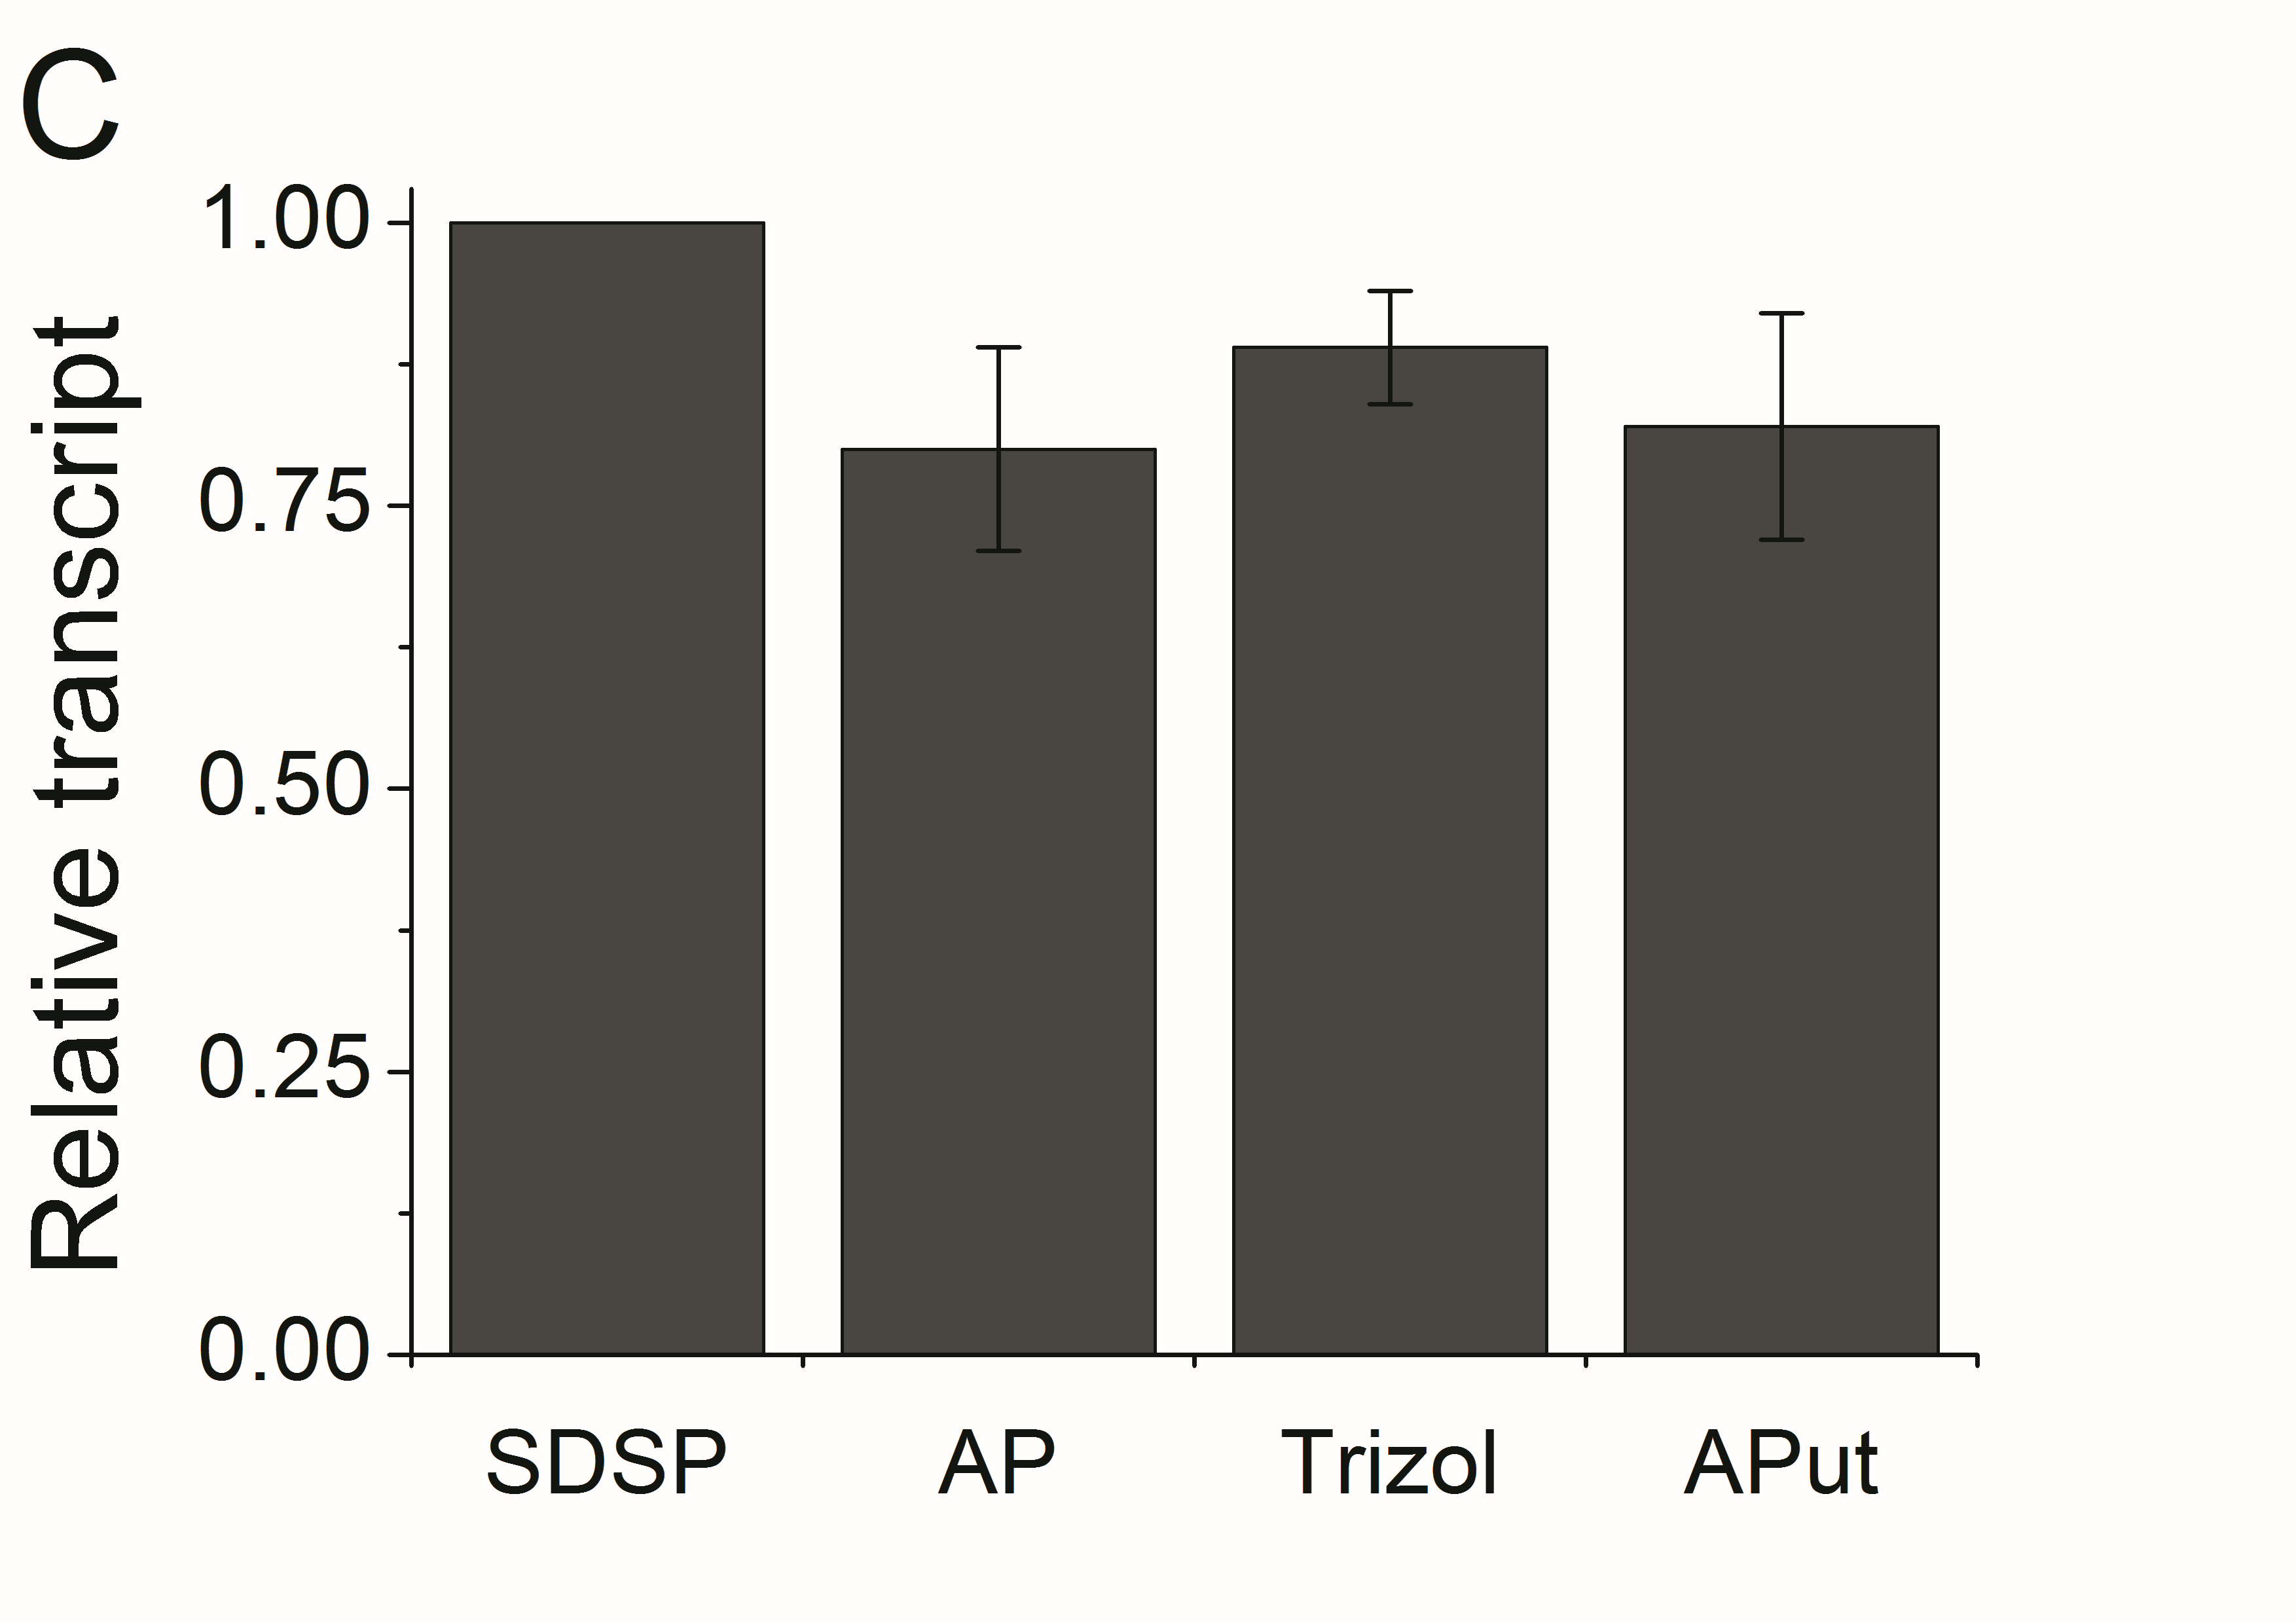


**Fig. S4** Comparison of the efficiencies of genomic DNA removing and RNA extraction from HEK293T cells using various RNA extraction methods. (A) The electrophoresis of the RNA samples extracted using the Trizol method, the SDS-phenol method (SDSP), and the AP method. Lanes M were the DNA markers. (B) The amounts of genomic DNA contamination in the RNA samples extracted using the above methods. The standard reactions (circles) were made by using the gonomic DNA in the 10-fold serial dilutions (from 106 to 102 copies) as the templates. The standard curve was generated by plotting of the threshold cycles (Ct) vs. the log copy numbers of the standards which had the PCR efficiency of 93.1% and R2 of 0.992. The copies of genomic DNA in 1 μg of the samples were read from the standard curve according to their experimental threshold cycles (slanted crosses). (C) The relative transcripts of the β-actin gene in the RNA samples extracted using the above methods from equal amounts of HEK293T cells. The samples were treated with RNase-free DNase I and used as the templates for reverse transcription. The transcripts in cDNA were quantified by quantitative PCR. The samples extracted using the SDS-phenol method (SDSP) were set as reference. The DNase untreated samples extracted using the AP method (APut) were also tested which gave no significantly difference compared with the treated ones (AP, *p* > 0.05).
